# Supplementary material for: A wheel-like polyoxometalate for haloperoxidase-inspired antibiofouling with H2O2in situ provided by electrocatalysis
Source: Royal Society of Chemistry journal article supplement (doi:10.1039/d4qi00482e), 2024-01-01
Supplement: d4qi00482e1.pdf [file d4qi00482e1.pdf]

## Electronic Supplementary Information (ESI)

### **A wheel-like polyoxometalate for haloperoxidase inspired antibiofouling with H<sub>2</sub>O<sub>2</sub> *in-situ* provided by electrocatalysis**

Yumeng Bian,<sup>#a</sup> Runze Wang,<sup>#a</sup> Xinxin Xu,<sup>\*a</sup> Jin Chen<sup>b</sup> and Qiang Wang<sup>\*b</sup>

<sup>a</sup> Department of Chemistry, College of Science, Northeastern University, Shenyang  
110819, Liaoning, China

<sup>b</sup> Key Laboratory of Electromagnetic Processing of Materials, Ministry of Education,  
Northeastern University, Shenyang 110819, Liaoning, China

## Materials and characterization

All chemicals were of analytical grade, commercially available from Sinopharm Chemical Reagent Co. Ltd (Shanghai, China) and used as received without further purification. XPS was performed on photoelectron spectroscopy (ESCALAB 250Xi, Thermo Fisher Scientific). UV-Vis spectrometer (T6 new century, Persee) was used to study haloperoxidase mimic activity. Electrochemical tests were conducted on electrochemical workstation (CHI-760E, Chenhua).

## Single-crystal X-ray diffraction

Single crystal of **Ni<sub>16</sub>Mo<sub>16</sub>P<sub>24</sub>** was selected under an optical microscope and glued on a glass fiber. Structural measurement was performed with a Bruker AXS SMART APEX II CCD diffractometer at 293 K. The structure was solved with direct methods and refined by using the full-matrix least-squares method on  $F^2$  with the the Olex2 software (Table S1 and S2). Anisotropic thermal parameters were used to refine all non-hydrogen atoms. Carbon-bound hydrogen atoms were placed in geometrically calculated positions. CIF file (CCDC 2315001) contains supplementary crystallographic data for this paper. The file can be obtained free of charge via [www.ccdc.cam.ac.uk/data\\_request/cif](http://www.ccdc.cam.ac.uk/data_request/cif) (Cambridge Crystallographic Data Centre).

## Haloperoxidase mimic activity

Haloperoxidase mimic activity was determined by bromination of PR with Br<sup>-</sup> and H<sub>2</sub>O<sub>2</sub>. UV-visible spectrometer (UV-Vis) was employed to measure the solution containing PR, NH<sub>4</sub>Br, H<sub>2</sub>O<sub>2</sub> and **Ni<sub>16</sub>Mo<sub>16</sub>P<sub>24</sub>**. Reaction velocity was studied with time course mode by monitoring the absorbance at 590 nm based on [Br<sub>4</sub>PR]. Lambert-Beer law is employed to calculate [Br<sub>4</sub>PR] and the extinction coefficient of Br<sub>4</sub>PR ( $\epsilon$ -Br<sub>4</sub>PR) was 72200 M<sup>-1</sup>·cm<sup>-1</sup>. In kinetic tests, concentration of one reactant changed while

others kept constant. Test was carried out until slope became constant to calculate kinetic parameters. All the tests were conducted for three times and the variations were exhibited with error bars.

### **RDE and RRDE tests**

RDE test was conducted in O<sub>2</sub> saturated PBS (0.1 M, pH = 7.4) with three-electrode system, in which carbon rod and saturated calomel electrode were employed as counter and reference electrodes. Working electrode was fabricated as follows: the mixture of **Ni<sub>16</sub>Mo<sub>16</sub>P<sub>24</sub>** (2 mg) and carbon black (Vulcan XC-72R, 8 mg) was dispersed in aqueous solution of water (0.8 mL), ethanol (0.15 mL) and 50 μL Nafion (5 %). The ink (10 μL) was dropped on RDE (electrode area is 0.196 cm<sup>2</sup>) and served as working electrode. Linear sweep voltammetry (LSV) was recorded at 10 mV·s<sup>-1</sup>. The rotating speed of RDE was 400, 625, 900, 1225 and 1600 rpm. The electron transfer number was calculated by the Koutechy-Levich (K-L) equation (Eq. 1). In this equation, *j* is the measured current density, *j<sub>k</sub>* is the kinetic current density, *ω* is the electrode rotating rate. The parameter *B* can be calculated from the slope of the K-L plots based on the following Levich equation (Eq. 2), in which *n* is the electron transfer number per oxygen molecule, *F* is the Faraday constant, *D<sub>0</sub>* is the diffusion coefficient of O<sub>2</sub>, *ν* is the kinetic viscosity and *C<sub>0</sub>* is the bulk concentration of O<sub>2</sub>.

$$1/j = 1/j_k + 1/B\omega^{1/2} \quad (1)$$

$$B = 0.62nF(D_0)^{2/3}(\nu)^{-1/6}C_0 \quad (2)$$

RRDE experiment was also conducted in O<sub>2</sub> saturated PBS (0.1 M, pH = 7.4). Working electrode was fabricated as follows: the mixture of **Ni<sub>16</sub>Mo<sub>16</sub>P<sub>24</sub>** (2 mg) and carbon black (Vulcan XC-72R, 8 mg) was dispersed in aqueous solution of water (0.8 mL), ethanol (0.15 mL) and 50 μL Nafion (5 %). The ink (10 μL) was dropped on RRDE and

served as working electrode. Carbon rod and saturated calomel electrode were employed as counter and reference electrodes. The disk potential was cycled from 0 to 1.0 V (vs. RHE) with a scan rate of  $10 \text{ mV}\cdot\text{s}^{-1}$ . The ring potential was constant at 1.2 V (vs. RHE). The  $\text{H}_2\text{O}_2$  selectivity and electron transfer number ( $n$ ) were calculated with Eq. 3 and 4. In these equations,  $I_D$  and  $I_R$  represent the disk and ring currents density.  $N$  ( $N = 0.37$ , obtained from  $\text{K}_3\text{Fe}(\text{CN})_6$  reduction experiments at various rotation rates) is the current collection efficiency of the Pt ring.

$$\text{H}_2\text{O}_2 \% = (200 \times I_R/N)/(I_R/N + I_D) \quad (3)$$

$$n = 4 \times I_d/(I_R/N + I_D) \quad (4)$$

### **$\text{H}_2\text{O}_2$ production performance**

The  $\text{H}_2\text{O}_2$  production test was studied in an H-cell device at room temperature. During test, the electrolyte (PBS, 0.1 M, pH = 7.4) was continuously purged with  $\text{O}_2$ . A constant electrolytic voltage of 0.1, 0.3 and 0.5 V (vs. RHE) was applied for  $\text{H}_2\text{O}_2$  production. Aliquots in the cathode room was take collected every 20 min and titrated against  $\text{Ce}(\text{SO}_4)_2$ . The concentration of  $\text{H}_2\text{O}_2$  evolved increased linearly with time, which indicates  **$\text{Ni}_{16}\text{Mo}_{16}\text{P}_{24}$**  had good stability.

### **Computational method**

All the density functional theory (DFT) calculations were performed by Vienna Ab-initio Simulation Package (VASP), employing the Projected Augmented Wave (PAW) method. The revised Perdew-Burke-Ernzerhof (RPBE) functional was used to describe the exchange and correlation effects. For all the geometry optimizations, the cutoff energy was set to be 400 eV. A  $3 \times 3 \times 1$  Monkhorst-Pack grid was used to carry out the surface calculations on the surface of  **$\text{Ni}_{16}\text{Mo}_{16}\text{P}_{24}$** . Free energy of an adsorbed species is defined as  $\Delta G_{\text{ads}} = \Delta E_{\text{ads}} + \Delta E_{\text{ZPE}} - T\Delta S_{\text{ads}}$ , in which  $\Delta E_{\text{ads}}$  is the electronic

adsorption energy,  $\Delta E_{\text{ZPE}}$  is the zero point energy difference between adsorbed and gaseous species, and  $T\Delta S_{\text{ads}}$  is the corresponding entropy difference between these two states.

### **Antibiofouling experiment**

*E. coli* was incubated at 37 °C for 12 h. The bacteria was separated from medium by centrifugation at 5000 rpm for 5 min. Bacteria was then diluted and suspended in 0.1 M PBS. PBS mediums containing  $10^7$  cfu·mL<sup>-1</sup> *E. coli* were prepared for antibiofouling experiments. *E. coli* (10 mL,  $10^7$  cfu·mL<sup>-1</sup>) was oscillated cultivation with Ti plate coated by **Ni<sub>16</sub>Mo<sub>16</sub>P<sub>24</sub>** for 2 h at 37 °C. In this test, the concentration of NH<sub>4</sub>Br was 0.4 mM. After that, surface of Ti plate coated by **Ni<sub>16</sub>Mo<sub>16</sub>P<sub>24</sub>** was gently washed by sterile PBS. Subsequently, Ti plate coated by **Ni<sub>16</sub>Mo<sub>16</sub>P<sub>24</sub>** was dyed with 4', 6-diamidino-2-phenylindole (DAPI, 1 μg·mL<sup>-1</sup>). Observation was performed by fluorescence microscopy. Antibiofouling tests for *S. aureus* were conducted in same way. For antibiofouling with H<sub>2</sub>O<sub>2</sub> in-situ provided by ORR, three-electrode system was used. Carbon rod and saturated calomel electrode were employed as counter and reference electrodes. Working electrode and **Ni<sub>16</sub>Mo<sub>16</sub>P<sub>24</sub>** ink was fabricated as above RDE test. Ti plate was used as current collector for working electrode. Before antibiofouling, the H<sub>2</sub>O<sub>2</sub> production test was conducted for 30 min at 0.3 V (vs. RHE).

Table S1. Crystal data and structure refinement for **Ni<sub>16</sub>Mo<sub>16</sub>P<sub>24</sub>**.

---

|                                   |                                                                                                               |
|-----------------------------------|---------------------------------------------------------------------------------------------------------------|
| Empirical formula                 | C <sub>10</sub> H <sub>8</sub> Mo <sub>8</sub> N <sub>3</sub> Ni <sub>9</sub> O <sub>86</sub> P <sub>13</sub> |
| Formula weight                    | 3244.71                                                                                                       |
| Crystal system                    | Triclinic                                                                                                     |
| Space group                       | P-1                                                                                                           |
| a (Å)                             | 15.5877(2)                                                                                                    |
| b (Å)                             | 17.2833(3)                                                                                                    |
| c (Å)                             | 18.8306(3)                                                                                                    |
| α (°)                             | 67.3750(10)                                                                                                   |
| β (°)                             | 71.7960(10)                                                                                                   |
| γ (°)                             | 81.9550(10)                                                                                                   |
| Volume (Å <sup>3</sup> )          | 4447.18(12)                                                                                                   |
| Z                                 | 2                                                                                                             |
| F(000)                            | 3120                                                                                                          |
| Reflections collected/unique      | 87234/29959                                                                                                   |
| R(int)                            | 0.0291                                                                                                        |
| Goodness of fit on F <sup>2</sup> | 1.132                                                                                                         |
| R <sub>1</sub>                    | 0.0478                                                                                                        |
| wR <sub>2</sub>                   | 0.1806                                                                                                        |

---

Table S2. Selected bond lengths (Å) and angles (°) of **Ni<sub>16</sub>Mo<sub>16</sub>P<sub>24</sub>**

|                |           |               |          |
|----------------|-----------|---------------|----------|
| Mo(1)-O(69)    | 1.680(4)  | Mo(2)-O(57)   | 1.671(4) |
| Mo(1)-O(26)    | 1.935(3)  | Mo(2)-O(34)   | 1.960(3) |
| Mo(1)-O(9)     | 1.944(3)  | Mo(2)-O(33)   | 1.973(3) |
| Mo(1)-O(29)#1  | 2.008(3)  | Mo(2)-O(25)   | 2.071(3) |
| Mo(1)-O(50)    | 2.071(4)  | Mo(2)-O(36)#1 | 2.077(3) |
| Mo(1)-O(5)     | 2.473(3)  | Mo(2)-O(13)   | 2.211(4) |
| Mo(3)-O(35)    | 1.675(4)  | Mo(4)-O(49)   | 1.691(4) |
| Mo(3)-O(3)     | 1.944(3)  | Mo(4)-O(26)   | 1.951(3) |
| Mo(3)-O(21)    | 1.956(3)  | Mo(4)-O(9)    | 1.957(3) |
| Mo(3)-O(43)#1  | 2.073(3)  | Mo(4)-O(2)    | 2.058(3) |
| Mo(3)-O(23)    | 2.079(3)  | Mo(4)-O(15)#1 | 2.089(3) |
| Mo(3)-O(5)     | 2.383(3)  | Mo(4)-O(39)   | 2.186(3) |
| Mo(5)-O(53)    | 1.684(4)  | Mo(6)-O(64)   | 1.675(4) |
| Mo(5)-O(3)     | 1.950(3)  | Mo(6)-O(12)   | 1.936(3) |
| Mo(5)-O(21)    | 1.966(3)  | Mo(6)-O(7)    | 1.929(3) |
| Mo(5)-O(19)    | 2.069(3)  | Mo(6)-O(27)   | 2.064(4) |
| Mo(5)-O(8)     | 2.074(4)  | Mo(6)-O(58)   | 2.074(3) |
| Mo(5)-O(31)    | 2.184(3)  | Mo(6)-O(14)   | 2.386(3) |
| Mo(7)-O(40)    | 1.678(4)  | Mo(8)-O(52)   | 1.679(4) |
| Mo(7)-O(34)    | 1.933(3)  | Mo(8)-O(7)    | 1.956(3) |
| Mo(7)-O(33)    | 1.944(3)  | Mo(8)-O(12)   | 1.984(3) |
| Mo(7)-O(18)    | 2.041(3)  | Mo(8)-O(17)   | 2.069(3) |
| Mo(7)-O(37)    | 2.054(4)  | Mo(8)-O(22)   | 2.080(3) |
| Mo(7)-O(14)    | 2.469(4)  | Mo(8)-O(38)   | 2.189(3) |
| Ni(8)-O(6)     | 2.033(4)  | Ni(9)-O(21)   | 2.015(3) |
| Ni(8)-O(6)#2   | 2.033(4)  | Ni(9)-O(68)   | 2.076(5) |
| Ni(8)-O(4)     | 2.092(3)  | Ni(9)-O(44)   | 2.083(3) |
| Ni(8)-O(4)#2   | 2.092(3)  | Ni(9)-O(24)   | 2.131(3) |
| Ni(8)-O(30)    | 2.324(4)  | Ni(9)-O(11)   | 2.176(3) |
| Ni(8)-O(30)#2  | 2.324(4)  | Ni(9)-O(51)   | 2.267(4) |
| Ni(7)-O(34)    | 2.047(3)  | Ni(6)-O(3)#1  | 2.021(3) |
| Ni(7)-O(78)    | 2.072(4)  | Ni(6)-O(74)   | 2.079(4) |
| Ni(7)-O(60)    | 2.076(3)  | Ni(6)-O(20)   | 2.083(3) |
| Ni(7)-O(28)    | 2.082(4)  | Ni(6)-O(48)   | 2.089(3) |
| Ni(7)-O(61)    | 2.104(3)  | Ni(6)-O(55)#1 | 2.106(4) |
| Ni(7)-O(32)    | 2.217(4)  | Ni(6)-O(54)   | 2.220(4) |
| Ni(5)-O(20)    | 2.032(3)  | Ni(4)-O(9)    | 2.038(3) |
| Ni(5)-O(26)#1  | 2.041(3)  | Ni(4)-O(70)   | 2.062(4) |
| Ni(5)-O(16)    | 2.072(3)  | Ni(4)-O(61)   | 2.099(3) |
| Ni(5)-O(30)    | 2.077(3)  | Ni(4)-O(60)   | 2.116(4) |
| Ni(5)-O(46)    | 2.109(3)  | Ni(4)-O(11)   | 2.183(3) |
| Ni(5)-O(54)    | 2.323(4)  | Ni(4)-O(51)   | 2.210(4) |
| Ni(10)-O(81)#1 | 2.114(11) | Ni(3)-O(12)   | 1.997(3) |

|                     |            |                     |            |
|---------------------|------------|---------------------|------------|
| Ni(10)-O(81)        | 2.114(11)  | Ni(3)-O(46)         | 2.041(3)   |
| Ni(10)-O(79)#1      | 2.066(5)   | Ni(3)-O(16)         | 2.123(3)   |
| Ni(10)-O(79)        | 2.066(5)   | Ni(3)-O(56)         | 2.126(4)   |
| Ni(10)-O(80)#1      | 2.105(7)   | Ni(3)-O(42)         | 2.196(4)   |
| Ni(10)-O(80)        | 2.105(7)   | Ni(3)-O(10)         | 2.211(3)   |
| Ni(2)-O(33)         | 2.030(3)   | Ni(1)-O(7)          | 2.029(3)   |
| Ni(2)-O(71)         | 2.078(4)   | Ni(1)-O(24)         | 2.050(3)   |
| Ni(2)-O(48)         | 2.088(4)   | Ni(1)-O(73)         | 2.056(5)   |
| Ni(2)-O(55)#1       | 2.104(4)   | Ni(1)-O(28)         | 2.066(4)   |
| Ni(2)-O(42)         | 2.200(4)   | Ni(1)-O(44)         | 2.077(3)   |
| Ni(2)-O(10)         | 2.202(3)   | Ni(1)-O(32)         | 2.361(4)   |
| O(69)-Mo(1)-O(26)   | 104.37(17) | O(57)-Mo(2)-O(34)   | 102.10(18) |
| O(69)-Mo(1)-O(9)    | 102.51(17) | O(57)-Mo(2)-O(33)   | 102.71(17) |
| O(26)-Mo(1)-O(9)    | 94.73(13)  | O(34)-Mo(2)-O(33)   | 93.57(14)  |
| O(69)-Mo(1)-O(29)#1 | 97.30(17)  | O(57)-Mo(2)-O(25)   | 96.46(18)  |
| O(26)-Mo(1)-O(29)#1 | 87.90(14)  | O(34)-Mo(2)-O(25)   | 86.42(14)  |
| O(9)-Mo(1)-O(29)#1  | 158.67(15) | O(33)-Mo(2)-O(25)   | 160.37(16) |
| O(69)-Mo(1)-O(50)   | 95.66(18)  | O(57)-Mo(2)-O(36)#1 | 94.36(18)  |
| O(26)-Mo(1)-O(50)   | 159.09(15) | O(34)-Mo(2)-O(36)#1 | 162.60(15) |
| O(9)-Mo(1)-O(50)    | 86.62(14)  | O(33)-Mo(2)-O(36)#1 | 88.23(13)  |
| O(29)#1-Mo(1)-O(50) | 83.60(15)  | O(25)-Mo(2)-O(36)#1 | 86.15(14)  |
| O(69)-Mo(1)-O(5)    | 173.18(16) | O(57)-Mo(2)-O(13)   | 173.31(16) |
| O(26)-Mo(1)-O(5)    | 81.79(13)  | O(34)-Mo(2)-O(13)   | 83.09(14)  |
| O(9)-Mo(1)-O(5)     | 79.61(12)  | O(33)-Mo(2)-O(13)   | 81.00(13)  |
| O(29)#1-Mo(1)-O(5)  | 79.83(12)  | O(25)-Mo(2)-O(13)   | 79.52(15)  |
| O(50)-Mo(1)-O(5)    | 77.93(13)  | O(36)#1-Mo(2)-O(13) | 80.10(14)  |
| O(35)-Mo(3)-O(3)    | 105.43(17) | O(49)-Mo(4)-O(26)   | 103.55(17) |



|                         |            |                         |            |
|-------------------------|------------|-------------------------|------------|
| O(35)-Mo(3)-O(21)       | 102.22(17) | O(49)-Mo(4)-O(9)        | 103.58(17) |
| O(3)-Mo(3)-O(21)        | 94.44(13)  | O(26)-Mo(4)-O(9)        | 93.78(13)  |
| O(35)-Mo(3)-<br>O(43)#1 | 92.00(17)  | O(49)-Mo(4)-O(2)        | 93.51(17)  |
| O(3)-Mo(3)-O(43)#1      | 86.81(14)  | O(26)-Mo(4)-O(2)        | 161.52(15) |
| O(21)-Mo(3)-<br>O(43)#1 | 164.80(14) | O(9)-Mo(4)-O(2)         | 89.02(13)  |
| O(35)-Mo(3)-O(23)       | 92.59(17)  | O(49)-Mo(4)-<br>O(15)#1 | 94.76(17)  |
| O(3)-Mo(3)-O(23)        | 160.68(15) | O(26)-Mo(4)-<br>O(15)#1 | 87.92(13)  |
| O(21)-Mo(3)-O(23)       | 88.35(14)  | O(9)-Mo(4)-<br>O(15)#1  | 160.60(14) |
| O(43)#1-Mo(3)-<br>O(23) | 85.64(15)  | O(2)-Mo(4)-<br>O(15)#1  | 83.55(13)  |
| O(35)-Mo(3)-O(5)        | 170.69(16) | O(49)-Mo(4)-<br>O(39)   | 171.27(16) |
| O(3)-Mo(3)-O(5)         | 83.38(13)  | O(26)-Mo(4)-<br>O(39)   | 83.00(13)  |
| O(21)-Mo(3)-O(5)        | 79.74(12)  | O(9)-Mo(4)-O(39)        | 81.48(13)  |
| O(43)#1-Mo(3)-O(5)      | 85.37(13)  | O(2)-Mo(4)-O(39)        | 79.35(14)  |
| O(23)-Mo(3)-O(5)        | 78.31(13)  | O(15)#1-Mo(4)-<br>O(39) | 79.55(13)  |
| O(53)-Mo(5)-O(3)        | 102.83(16) | O(64)-Mo(6)-<br>O(12)   | 102.36(18) |
| O(53)-Mo(5)-O(21)       | 102.35(16) | O(64)-Mo(6)-O(7)        | 104.38(17) |
| O(3)-Mo(5)-O(21)        | 93.94(14)  | O(12)-Mo(6)-O(7)        | 95.29(14)  |
| O(53)-Mo(5)-O(19)       | 93.47(18)  | O(64)-Mo(6)-<br>O(27)   | 93.01(17)  |
| O(3)-Mo(5)-O(19)        | 161.84(16) | O(12)-Mo(6)-<br>O(27)   | 163.61(15) |
| O(21)-Mo(5)-O(19)       | 90.29(14)  | O(7)-Mo(6)-O(27)        | 86.22(14)  |
| O(53)-Mo(5)-O(8)        | 97.73(17)  | O(64)-Mo(6)-<br>O(58)   | 93.48(17)  |
| O(3)-Mo(5)-O(8)         | 86.57(14)  | O(12)-Mo(6)-<br>O(58)   | 87.88(14)  |
| O(21)-Mo(5)-O(8)        | 159.25(15) | O(7)-Mo(6)-O(58)        | 160.68(15) |
| O(19)-Mo(5)-O(8)        | 83.31(14)  | O(27)-Mo(6)-<br>O(58)   | 85.53(15)  |
| O(53)-Mo(5)-O(31)       | 171.86(16) | O(64)-Mo(6)-<br>O(14)   | 171.76(16) |
| O(3)-Mo(5)-O(31)        | 84.48(14)  | O(12)-Mo(6)-<br>O(14)   | 80.61(13)  |
| O(21)-Mo(5)-O(31)       | 80.46(13)  | O(7)-Mo(6)-O(14)        | 82.84(13)  |

|                   |            |                     |            |
|-------------------|------------|---------------------|------------|
| O(19)-Mo(5)-O(31) | 78.81(15)  | O(27)-Mo(6)-O(14)   | 83.40(13)  |
| O(8)-Mo(5)-O(31)  | 78.95(14)  | O(58)-Mo(6)-O(14)   | 78.87(13)  |
| O(40)-Mo(7)-O(34) | 103.75(17) | O(52)-Mo(8)-O(7)    | 102.69(17) |
| O(40)-Mo(7)-O(33) | 102.92(17) | O(52)-Mo(8)-O(12)   | 102.60(17) |
| O(34)-Mo(7)-O(33) | 95.36(14)  | O(7)-Mo(8)-O(12)    | 92.95(14)  |
| O(40)-Mo(7)-O(18) | 94.98(17)  | O(52)-Mo(8)-O(17)   | 96.46(18)  |
| O(34)-Mo(7)-O(18) | 159.87(15) | O(7)-Mo(8)-O(17)    | 86.62(13)  |
| O(33)-Mo(7)-O(18) | 87.47(14)  | O(12)-Mo(8)-O(17)   | 160.53(15) |
| O(40)-Mo(7)-O(37) | 94.09(17)  | O(52)-Mo(8)-O(22)   | 92.74(18)  |
| O(34)-Mo(7)-O(37) | 87.27(14)  | O(7)-Mo(8)-O(22)    | 163.50(15) |
| O(33)-Mo(7)-O(37) | 161.59(15) | O(12)-Mo(8)-O(22)   | 89.32(14)  |
| O(18)-Mo(7)-O(37) | 84.05(15)  | O(17)-Mo(8)-O(22)   | 85.84(14)  |
| O(40)-Mo(7)-O(14) | 171.59(15) | O(52)-Mo(8)-O(38)   | 173.27(16) |
| O(34)-Mo(7)-O(14) | 84.01(13)  | O(7)-Mo(8)-O(38)    | 83.30(14)  |
| O(33)-Mo(7)-O(14) | 79.24(13)  | O(12)-Mo(8)-O(38)   | 79.93(13)  |
| O(18)-Mo(7)-O(14) | 76.93(13)  | O(17)-Mo(8)-O(38)   | 80.69(14)  |
| O(37)-Mo(7)-O(14) | 82.93(13)  | O(22)-Mo(8)-O(38)   | 81.00(15)  |
| O(21)-Ni(9)-O(68) | 86.08(16)  | O(6)-Ni(8)-O(6)#2   | 180.00(15) |
| O(21)-Ni(9)-O(44) | 166.39(14) | O(6)-Ni(8)-O(4)     | 88.76(14)  |
| O(68)-Ni(9)-O(44) | 84.73(16)  | O(6)#2-Ni(8)-O(4)   | 91.24(14)  |
| O(21)-Ni(9)-O(24) | 93.91(13)  | O(6)-Ni(8)-O(4)#2   | 91.24(14)  |
| O(68)-Ni(9)-O(24) | 98.98(19)  | O(6)#2-Ni(8)-O(4)#2 | 88.76(14)  |
| O(44)-Ni(9)-O(24) | 77.67(13)  | O(4)-Ni(8)-O(4)#2   | 180.0(3)   |
| O(21)-Ni(9)-O(11) | 88.53(13)  | O(6)-Ni(8)-O(30)    | 95.13(13)  |
| O(68)-Ni(9)-O(11) | 168.45(17) | O(6)#2-Ni(8)-O(30)  | 84.87(13)  |
| O(44)-Ni(9)-O(11) | 102.23(13) | O(4)-Ni(8)-O(30)    | 96.47(12)  |
| O(24)-Ni(9)-O(11) | 91.57(14)  | O(4)#2-Ni(8)-O(30)  | 83.53(12)  |
| O(21)-Ni(9)-O(51) | 101.21(13) | O(6)-Ni(8)-O(30)#2  | 84.87(13)  |

|                     |            |                          |            |
|---------------------|------------|--------------------------|------------|
| O(68)-Ni(9)-O(51)   | 97.72(18)  | O(6)#2-Ni(8)-<br>O(30)#2 | 95.13(13)  |
| O(44)-Ni(9)-O(51)   | 89.97(13)  | O(4)-Ni(8)-<br>O(30)#2   | 83.53(12)  |
| O(24)-Ni(9)-O(51)   | 158.15(14) | O(4)#2-Ni(8)-<br>O(30)#2 | 96.47(12)  |
| O(11)-Ni(9)-O(51)   | 73.32(13)  | O(30)-Ni(8)-<br>O(30)#2  | 180.00(14) |
| O(34)-Ni(7)-O(78)   | 88.20(16)  | O(3)#1-Ni(6)-<br>O(74)   | 88.22(16)  |
| O(34)-Ni(7)-O(60)   | 98.54(14)  | O(3)#1-Ni(6)-<br>O(20)   | 91.81(13)  |
| O(78)-Ni(7)-O(60)   | 103.01(19) | O(74)-Ni(6)-O(20)        | 105.35(17) |
| O(34)-Ni(7)-O(28)   | 91.62(14)  | O(3)#1-Ni(6)-<br>O(48)   | 172.15(15) |
| O(78)-Ni(7)-O(28)   | 100.66(18) | O(74)-Ni(6)-O(48)        | 84.80(16)  |
| O(60)-Ni(7)-O(28)   | 154.46(15) | O(20)-Ni(6)-O(48)        | 93.49(14)  |
| O(34)-Ni(7)-O(61)   | 171.94(15) | O(3)#1-Ni(6)-<br>O(55)#1 | 98.64(14)  |
| O(78)-Ni(7)-O(61)   | 84.34(16)  | O(74)-Ni(6)-<br>O(55)#1  | 97.29(18)  |
| O(60)-Ni(7)-O(61)   | 80.24(13)  | O(20)-Ni(6)-<br>O(55)#1  | 155.35(15) |
| O(28)-Ni(7)-O(61)   | 92.75(14)  | O(48)-Ni(6)-<br>O(55)#1  | 78.76(14)  |
| O(34)-Ni(7)-O(32)   | 91.88(14)  | O(3)#1-Ni(6)-<br>O(54)   | 92.04(14)  |
| O(78)-Ni(7)-O(32)   | 173.49(18) | O(74)-Ni(6)-O(54)        | 178.36(19) |
| O(60)-Ni(7)-O(32)   | 83.41(15)  | O(20)-Ni(6)-O(54)        | 73.03(14)  |
| O(28)-Ni(7)-O(32)   | 72.83(14)  | O(48)-Ni(6)-O(54)        | 95.04(14)  |
| O(61)-Ni(7)-O(32)   | 95.88(14)  | O(55)#1-Ni(6)-<br>O(54)  | 84.28(15)  |
| O(20)-Ni(5)-O(26)#1 | 95.13(14)  | O(9)-Ni(4)-O(70)         | 85.13(16)  |
| O(20)-Ni(5)-O(16)   | 152.26(14) | O(9)-Ni(4)-O(61)         | 167.67(15) |
| O(26)#1-Ni(5)-O(16) | 96.34(13)  | O(70)-Ni(4)-O(61)        | 85.72(16)  |
| O(20)-Ni(5)-O(30)   | 92.25(14)  | O(9)-Ni(4)-O(60)         | 93.68(13)  |
| O(26)#1-Ni(5)-O(30) | 90.68(14)  | O(70)-Ni(4)-O(60)        | 98.03(18)  |
| O(16)-Ni(5)-O(30)   | 112.75(15) | O(61)-Ni(4)-O(60)        | 79.44(13)  |
| O(20)-Ni(5)-O(46)   | 93.56(14)  | O(9)-Ni(4)-O(11)         | 88.83(13)  |
| O(26)#1-Ni(5)-O(46) | 169.37(14) | O(70)-Ni(4)-O(11)        | 168.30(17) |
| O(16)-Ni(5)-O(46)   | 78.55(13)  | O(61)-Ni(4)-O(11)        | 101.58(13) |
| O(30)-Ni(5)-O(46)   | 82.86(14)  | O(60)-Ni(4)-O(11)        | 92.34(14)  |
| O(20)-Ni(5)-O(54)   | 71.76(13)  | O(9)-Ni(4)-O(51)         | 102.20(13) |
| O(26)#1-Ni(5)-O(54) | 96.64(13)  | O(70)-Ni(4)-O(51)        | 97.16(18)  |

|                            |            |                   |            |
|----------------------------|------------|-------------------|------------|
| O(16)-Ni(5)-O(54)          | 81.87(14)  | O(61)-Ni(4)-O(51) | 87.13(13)  |
| O(30)-Ni(5)-O(54)          | 162.89(15) | O(60)-Ni(4)-O(51) | 158.85(14) |
| O(46)-Ni(5)-O(54)          | 91.88(13)  | O(11)-Ni(4)-O(51) | 74.31(13)  |
| O(81)#1-Ni(10)-<br>O(81)   | 180.000(1) | O(12)-Ni(3)-O(46) | 166.12(15) |
| O(81)#1-Ni(10)-<br>O(79)#1 | 81.0(4)    | O(12)-Ni(3)-O(16) | 95.20(14)  |
| O(81)-Ni(10)-<br>O(79)#1   | 99.0(4)    | O(46)-Ni(3)-O(16) | 78.89(13)  |
| O(81)#1-Ni(10)-<br>O(79)   | 99.0(4)    | O(12)-Ni(3)-O(56) | 85.06(16)  |
| O(81)-Ni(10)-O(79)         | 81.0(4)    | O(46)-Ni(3)-O(56) | 82.92(15)  |
| O(79)#1-Ni(10)-<br>O(79)   | 180.0(2)   | O(16)-Ni(3)-O(56) | 94.45(17)  |
| O(81)#1-Ni(10)-<br>O(80)#1 | 89.6(4)    | O(12)-Ni(3)-O(42) | 101.62(14) |
| O(81)-Ni(10)-<br>O(80)#1   | 90.4(4)    | O(46)-Ni(3)-O(42) | 87.81(14)  |
| O(79)#1-Ni(10)-<br>O(80)#1 | 94.5(2)    | O(16)-Ni(3)-O(42) | 156.85(14) |
| O(79)-Ni(10)-<br>O(80)#1   | 85.5(2)    | O(56)-Ni(3)-O(42) | 102.69(16) |
| O(81)#1-Ni(10)-<br>O(80)   | 90.4(4)    | O(12)-Ni(3)-O(10) | 89.26(13)  |
| O(81)-Ni(10)-O(80)         | 89.6(4)    | O(46)-Ni(3)-O(10) | 103.33(13) |
| O(79)#1-Ni(10)-<br>O(80)   | 85.5(2)    | O(16)-Ni(3)-O(10) | 91.46(14)  |
| O(79)-Ni(10)-O(80)         | 94.5(2)    | O(56)-Ni(3)-O(10) | 172.14(16) |
| O(80)#1-Ni(10)-<br>O(80)   | 180.000(1) | O(42)-Ni(3)-O(10) | 73.13(13)  |
| O(33)-Ni(2)-O(71)          | 86.78(16)  | O(7)-Ni(1)-O(24)  | 98.59(14)  |
| O(33)-Ni(2)-O(48)          | 167.79(15) | O(7)-Ni(1)-O(73)  | 87.78(17)  |
| O(71)-Ni(2)-O(48)          | 84.52(16)  | O(24)-Ni(1)-O(73) | 103.7(2)   |
| O(33)-Ni(2)-O(55)#1        | 94.08(14)  | O(7)-Ni(1)-O(28)  | 95.80(14)  |
| O(71)-Ni(2)-O(55)#1        | 98.8(2)    | O(24)-Ni(1)-O(28) | 151.25(14) |
| O(48)-Ni(2)-O(55)#1        | 78.85(14)  | O(73)-Ni(1)-O(28) | 101.56(19) |
| O(33)-Ni(2)-O(42)          | 101.87(14) | O(7)-Ni(1)-O(44)  | 170.19(15) |
| O(71)-Ni(2)-O(42)          | 96.85(18)  | O(24)-Ni(1)-O(44) | 79.62(14)  |
| O(48)-Ni(2)-O(42)          | 87.68(14)  | O(73)-Ni(1)-O(44) | 83.32(17)  |
| O(55)#1-Ni(2)-O(42)        | 158.21(15) | O(28)-Ni(1)-O(44) | 90.04(14)  |
| O(33)-Ni(2)-O(10)          | 86.79(13)  | O(7)-Ni(1)-O(32)  | 97.54(13)  |
| O(71)-Ni(2)-O(10)          | 166.79(18) | O(24)-Ni(1)-O(32) | 83.38(14)  |
| O(48)-Ni(2)-O(10)          | 103.39(14) | O(73)-Ni(1)-O(32) | 170.44(18) |
| O(55)#1-Ni(2)-O(10)        | 93.16(14)  | O(28)-Ni(1)-O(32) | 70.10(13)  |

|                   |           |                   |           |
|-------------------|-----------|-------------------|-----------|
| O(42)-Ni(2)-O(10) | 73.24(13) | O(44)-Ni(1)-O(32) | 91.85(13) |
|-------------------|-----------|-------------------|-----------|

**Table S3.** Comparison haloperoxidase mimic activity of **Ni<sub>16</sub>Mo<sub>16</sub>P<sub>24</sub>** with other materials

|   | Catalysts                | K <sub>m</sub> (Br <sup>-</sup> ) | K <sub>m</sub> (H <sub>2</sub> O <sub>2</sub> ) | Reference |
|---|--------------------------|-----------------------------------|-------------------------------------------------|-----------|
| 1 | Co-MoS <sub>2</sub>      | 28 mM                             | 117 μM                                          | S1        |
| 2 | CeO <sub>2-x</sub> (R=1) | 206.9 mM                          | 476.8 μM                                        | S2        |
| 3 | Cr-SA-CN                 | 18.1 mM                           | 22 μM                                           | S3        |
| 4 | Mo SA-N/C                | 9.9 mM                            | 219.3 μM                                        | S4        |
| 5 | W-UiO                    | \                                 | 555 μM                                          | S5        |

|   |                                                     |          |           |           |
|---|-----------------------------------------------------|----------|-----------|-----------|
| 6 | CeO <sub>2</sub> @ZrO <sub>2</sub>                  | 22 mM    | 102 μM    | S6        |
| 7 | CeO <sub>2</sub> @C                                 | 500 mM   | 2100 μM   | S7        |
| 8 | <b>Ni<sub>16</sub>Mo<sub>16</sub>P<sub>24</sub></b> | 27.72 μM | 114.38 μM | This work |

**Table S4.** Comparison H<sub>2</sub>O<sub>2</sub> production ability of **Ni<sub>16</sub>Mo<sub>16</sub>P<sub>24</sub>** with other materials

| Catalysts                        | E<br>(vs. RHE) | Production rate<br>(mol·g <sup>-1</sup> ·h <sup>-1</sup> ) | Reference |
|----------------------------------|----------------|------------------------------------------------------------|-----------|
| CeO <sub>2</sub> NCs             | 0.5            | 0.63                                                       | S8        |
| O-P/N-C900                       | 0.1            | 0.69                                                       | S9        |
| rGO/PEI                          | 0.74           | 0.11                                                       | S10       |
| Oxo-G/NH <sub>3</sub>            | 0.2            | 0.25                                                       | S11       |
| Fe <sub>2</sub> O <sub>3-x</sub> | 0.1            | 0.45                                                       | S12       |

|                                                     |      |      |           |
|-----------------------------------------------------|------|------|-----------|
| NCMK3IL50                                           | 0.1  | 0.56 | S13       |
| NOC-6M                                              | 0.55 | 0.55 | S14       |
| HNCS                                                | 0.4  | 0.62 | S15       |
| <b>Ni<sub>16</sub>Mo<sub>16</sub>P<sub>24</sub></b> | 0.1  | 0.78 | This work |

---

**Table S5** Comparison nanozyme performance of **Ni<sub>16</sub>Mo<sub>16</sub>P<sub>24</sub>** with other POMs

|   | POMs                                                                                                   | Activity         | Application                             | Reference |
|---|--------------------------------------------------------------------------------------------------------|------------------|-----------------------------------------|-----------|
| 1 | GdP <sub>5</sub> W <sub>30</sub> O <sub>110</sub> @WS <sub>2</sub> NCs                                 | Peroxidase-mimic | H <sub>2</sub> O <sub>2</sub> detection | S16       |
| 2 | n-[Bu <sub>4</sub> -N] <sub>2</sub> [Mo <sub>6</sub> O <sub>18</sub> NC <sub>13</sub> H <sub>9</sub> ] | Peroxidase-mimic | H <sub>2</sub> O <sub>2</sub> detection | S17       |

|   |                                                                                       |                      |                                   |           |
|---|---------------------------------------------------------------------------------------|----------------------|-----------------------------------|-----------|
| 3 | GOx-PTA@MS                                                                            | Peroxidase-mimic     | Glucose detection                 | S18       |
| 4 | Au@POM NPs                                                                            | Peroxidase-mimic     | bacterial detections              | S19       |
| 5 | CuO NP-POM                                                                            | Peroxidase-mimic     | AA and Fe <sup>2+</sup> detection | S20       |
| 6 | [Ag <sub>2</sub> (bit) <sub>2</sub> ] <sub>2</sub> [Mo <sub>8</sub> O <sub>26</sub> ] | Peroxidase-mimic     | L-Cys detection                   | S21       |
| 7 | <b>Ni<sub>16</sub>Mo<sub>16</sub>P<sub>24</sub></b>                                   | Haloperoxidase mimic | antibiofouling                    | This work |

---

## References

- (S1) Q, Luo.; J, Li.; W, Wang.; Y, Li.; Y, Li.; X, Huo.; J, Li.; N, Wang., Transition metal engineering of molybdenum disulfide nanozyme for biomimicking anti-biofouling in seawater. *ACS Appl Mater Interfaces* **2022**, *14*, 14218-14225
- (S2) J, Lang.; X, Ma.; P, Chen.; M. D. Serota; N. M. Andre; G. R. Whittaker; R, Yang., Haloperoxidase-mimicking CeO<sub>2-x</sub> nanorods for the deactivation of human coronavirus OC43. *Nanoscale* **2022**, *14*, 3731-3737



- (S3) Q, Luo.; Y, Li.; X, Huo.; L, Li.; Y, Song.; S, Chen.; H, Lin.; N, Wang., Atomic chromium coordinated graphitic carbon nitride for bioinspired antibiofouling in seawater. *Adv Sci (Weinh)* **2022**, *9*, e2105346
- (S4) W, Wang.; Q, Luo.; J, Li.; L, Li.; Y, Li.; X, Huo.; X, Du.; Z, Li.; N, Wang., Photothermal-amplified single atom nanozyme for biofouling control in seawater. *Adv. Funct. Mater* **2022**, *32*, 2205461
- (S5) W, Wang.; Q, Luo.; J, Li.; Y, Li.; R, Wu.; Y, Li.; X, Huo.; N, Wang., Single-atom tungsten engineering of MOFs with biomimetic antibiofilm activity toward robust uranium extraction from seawater. *Chem. Eng. J* **2022**, *431*, 133483
- (S6) Q, Luo.; Y, Li.; X, Huo.; J, Li.; L, Li.; W, Wang.; Y, Li.; S, Chen.; Y, Song., N, Wang., Stabilizing ultrasmall ceria-cluster nanozyme for antibacterial and antibiofouling applications. *Small* **2022**, *18*, e2107401
- (S7) N, Wang.; W, Li.; Y, Ren.; J, Duan.; X, Zhai.; F, Guan.; L, Wang.; B, Hou., Investigating the properties of nano core-shell CeO<sub>2</sub>@C as haloperoxidase mimicry catalyst for antifouling applications. *Colloid Surface A* **2021**, *608*, 125592
- (S8) M, Cheng.; Z, Li.; T, Xu.; Y, Mao.; Y, Zhang.; G, Zhang.; Z, Yan, Efficient overall 2e<sup>-</sup> oxygen electrolysis to H<sub>2</sub>O<sub>2</sub> on CeO<sub>2</sub> nanocubes. *Electrochim. Acta* **2022**, *430*, 141091
- (S9) Z, Li.; A, Kumar.; N, Liu.; M, Cheng.; C, Zhao.; X, Meng.; H, Li.; Y, Zhang.; Z, Liu.; G, Zhang.; X, Sun., Oxygenated P/N co-doped carbon for efficient 2e<sup>-</sup> oxygen reduction to H<sub>2</sub>O<sub>2</sub>. *J. Mater. Chem. A* **2022**, *10*, 14355-14363
- (S10) X, Xiao.; T, Wang.; J, Bai.; F, Li.; T, Ma.; Y, Chen., Enhancing the selectivity of H<sub>2</sub>O<sub>2</sub> electrogeneration by steric hindrance effect. *ACS Appl. Mater. Interfaces* **2018**, *10*, 42534-42541
- (S11) L, Han.; Y, Sun.; S, Li.; C, Cheng.; C, Halbig.; P, Feicht.; J, Hübner.; P, Strasser.; S, Eigler. In-plane carbon lattice-defect regulating electrochemical oxygen reduction to hydrogen peroxide production over nitrogen-doped graphene. *ACS Catal.* **2019**, *9*, 1283-1288
- (S12) R, Gao.; L, Pan.; Z, Li.; C, Shi.; Y, Yao.; X, Zhang.; J, Zou. Engineering facets and oxygen vacancies over hematite single crystal for intensified electrocatalytic H<sub>2</sub>O<sub>2</sub> production. *Adv. Funct. Mater.* **2020**, *30*, 1910539
- (S13) Y, Sun.; I, Sinev.; W, Ju.; A, Bergmann.; S, Dresp.; S, Köhl.; C, Spöri.; H, Schmies.; H, Wang.; D, Bernsmeier.; B, Paul.; R, Schmack.; R, Kraehnert.; B, Roldan Cuenya.; P,

Strasser. Efficient electrochemical hydrogen peroxide production from molecular oxygen on nitrogen-doped mesoporous carbon catalysts. *ACS Catal.* **2018**, *8*, 2844-2856

(S14) C, Zhang.; G, Liu.; B, Ning.; S, Qian.; D, Zheng.; L, Wang. Highly efficient electrochemical generation of H<sub>2</sub>O<sub>2</sub> on N/O co-modified defective carbon. *Int. J. Hydrogen Energy* **2021**, *46*, 14277-14287

(S15) Y, Hu.; J, Zhang.; T, Shen.; Z, Li.; K, Chen.; Y, Lu.; J, Zhang.; D, Wang. Efficient electrochemical production of H<sub>2</sub>O<sub>2</sub> on hollow N-doped carbon nanospheres with abundant micropores. *ACS Appl. Mater. Interfaces* **2021**, *13*, 29551-29557

(S16) G, Du.; M, Lv.; H, Wang.; C, Liu.; Q, Xu.; J, Liu.; Z, Yang.; Y, Yong.; Y, Han., A polyoxometalate-based heterojunction nanozyme with peroxidase-mimic catalytic activity for sensitive biomolecule detection. *Nanoscale Adv* **2023**, *5*, 3985-3993

(S17) M. L. Mujica; I. Sotomayor-Santander; P. Hermosilla-Ibáñez; F. Oyarzun-Ampuero; M. C. Rodríguez; G. A. Rivas; D. Venegas-Yazigi; S. Bollo, MWCNT-organoimido polyoxomolybdate hybrid material: analytical applications for amperometric sensing of hydrogen peroxide. *Electronanal* **2021**, *33*, 2105-2114

(S18) J. Nayak; R. Chilivery; A. K. Kumar; G. Begum; R. K. Rana, A bioinspired assembly to simultaneously heterogenize polyoxometalates as nanozymes and encapsulate enzymes in a microstructure endowing efficient peroxidase-mimicking activity. *ACS sustain Chem Eng.* **2021**, *9*, 15819-15829

(S19) X, Liao.; W, Tong.; L, Dai.; L, Han.; H, Sun.; W, Liu.; C, Wang., Nanozyme-catalyzed cascade reaction enables a highly sensitive detection of live bacteria. *J Mater Chem B* **2023**, *11*, 4890-4898

(S20) Y, Xu.; P, Li.; X, Hu.; H, Chen.; Y, Tang.; Y, Zhu.; X, Zhu.; Y, Zhang.; M, Liu.; S, Yao., Polyoxometalate nanostructures decorated with CuO nanoparticles for sensing ascorbic acid and Fe<sup>2+</sup> ions. *ACS Appl. Nano Mater.* **2021**, *4*, 8302-8313

(S21) B, Li.; H, Chang.; W, Wang.; S, Wang., Study on polyoxomolybdate [Mo<sub>8</sub>O<sub>26</sub>]<sup>4-</sup> based crystalline compound and its polypyrrole nanocomposite as l-cysteine colorimetric biosensor. *J. Clust Sci* **2022**, *33*, 2463–2473

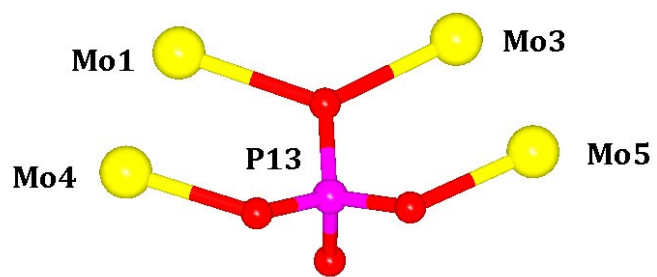

**Fig. S1.** The coordination mode of  $\text{PO}_4^{3-}$  group (P13).

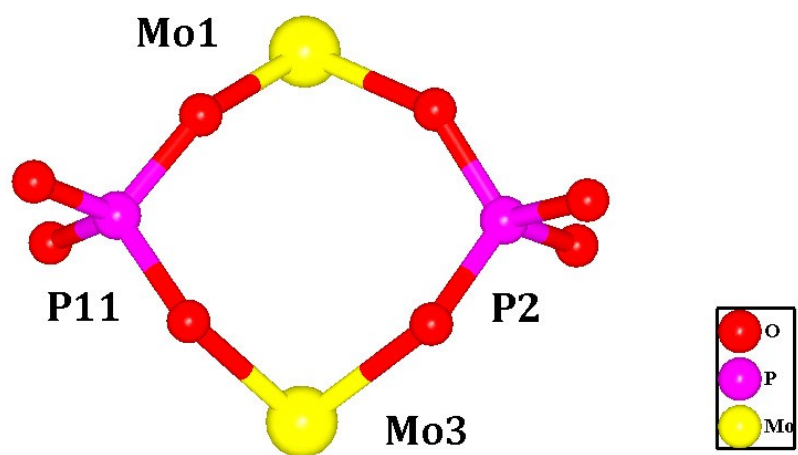

**Fig. S2.** The coordination modes of two PO<sub>4</sub><sup>3-</sup> groups (P2 and P11).

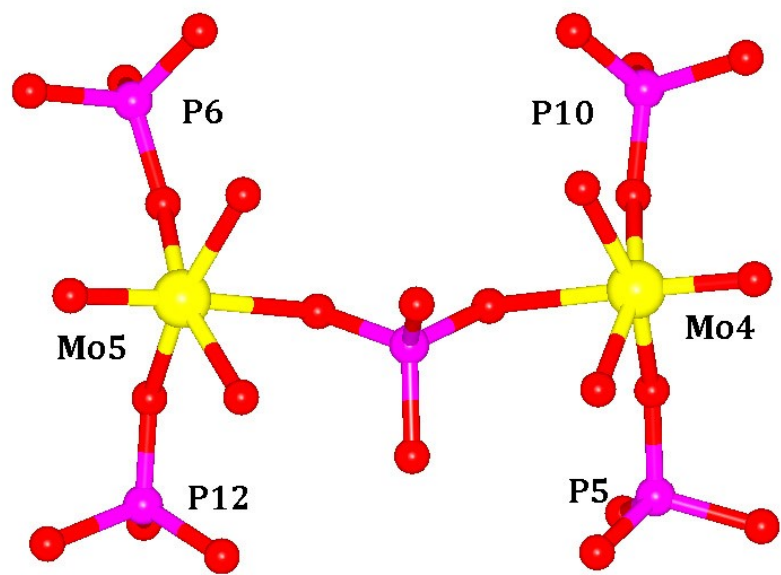

**Fig. S3.** The coordination modes of four  $\text{PO}_4^{3-}$  groups (P5, P10 and P6, P12).

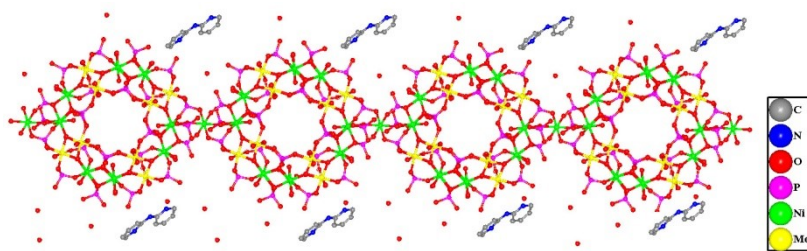

**Fig. S4.** One-dimensional chain-like structure of  $\text{Ni}_{16}\text{Mo}_{16}\text{P}_{24}$ .

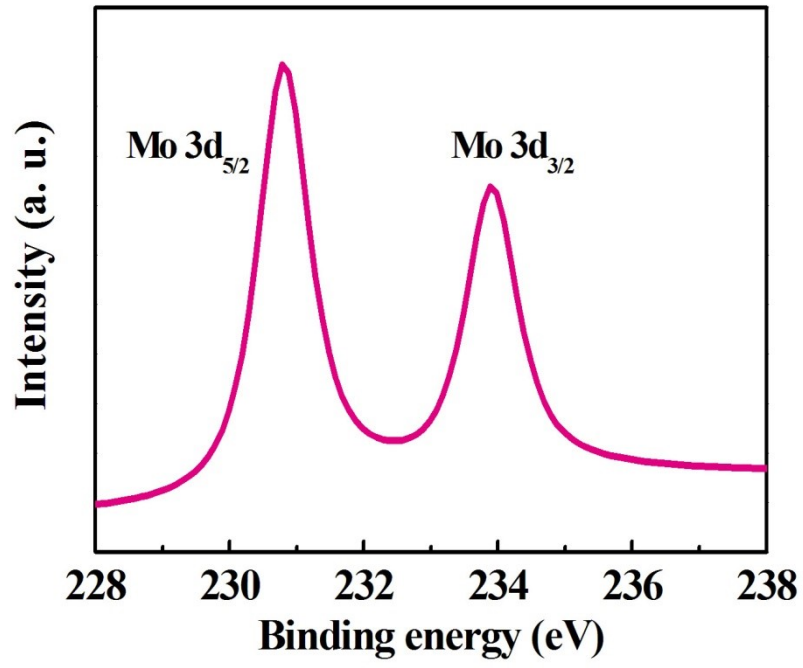

Fig. S5. High resolution Mo 3d XPS spectrum of  $\text{Ni}_{16}\text{Mo}_{16}\text{P}_{24}$ .



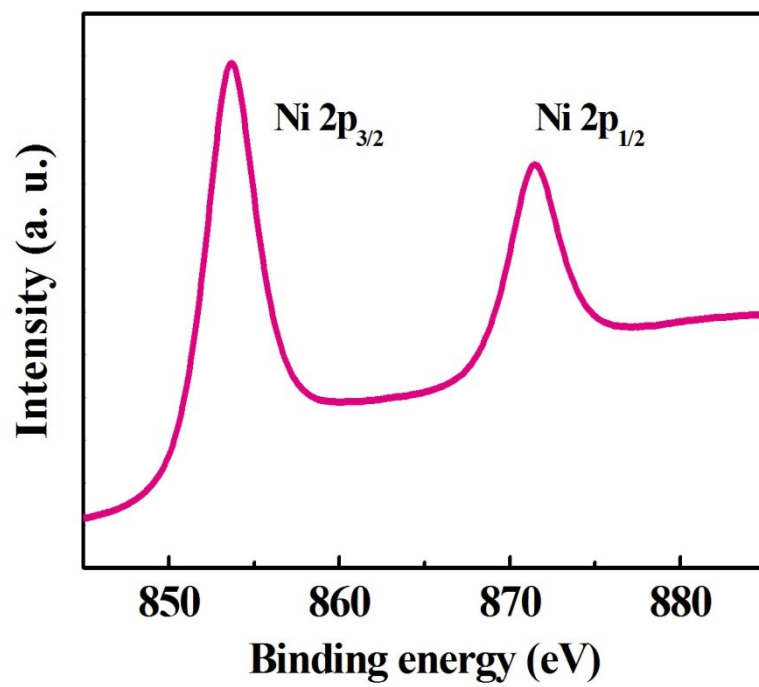

Fig. S6. High resolution Ni 2p XPS spectrum of  $\text{Ni}_{16}\text{Mo}_{16}\text{P}_{24}$ .

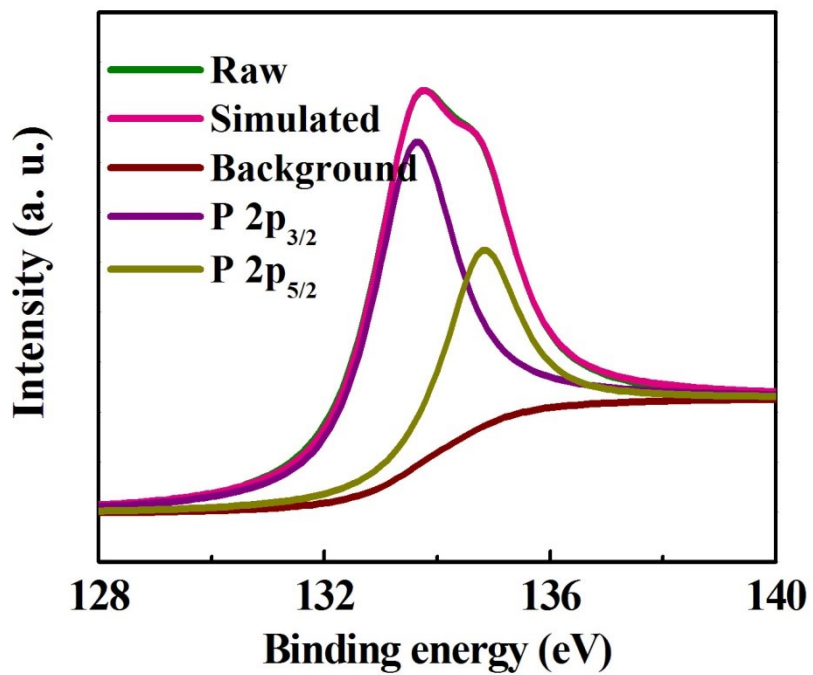

Fig. S7. High resolution P 2p XPS spectrum of  $\text{Ni}_{16}\text{Mo}_{16}\text{P}_{24}$ .

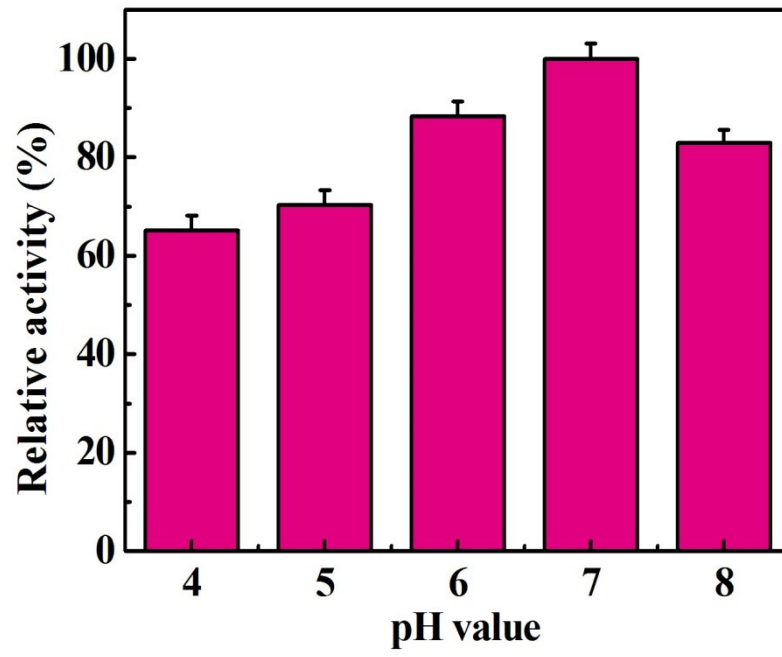

**Fig. S8.** The influence of pH value on haloperoxidase mimic activity.

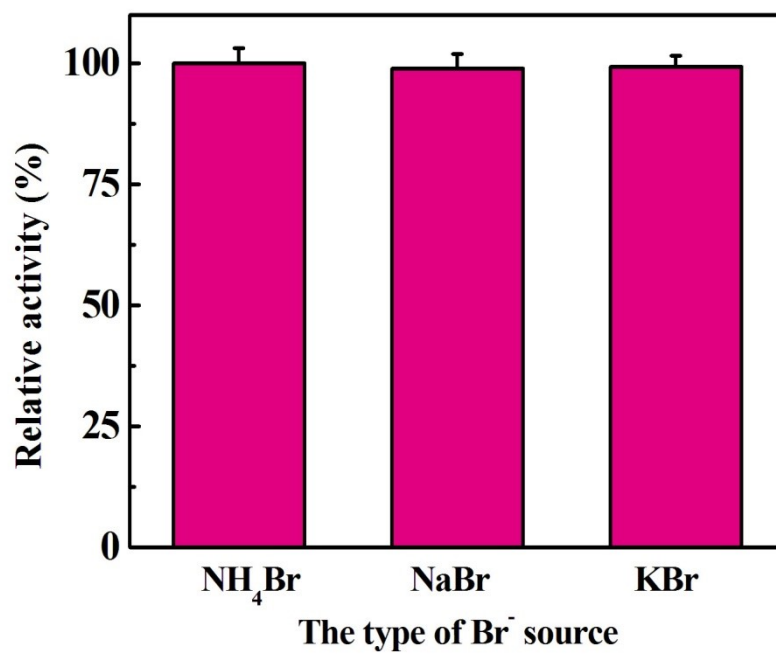

**Fig. S9.** The influence of temperature on haloperoxidase mimic activity.

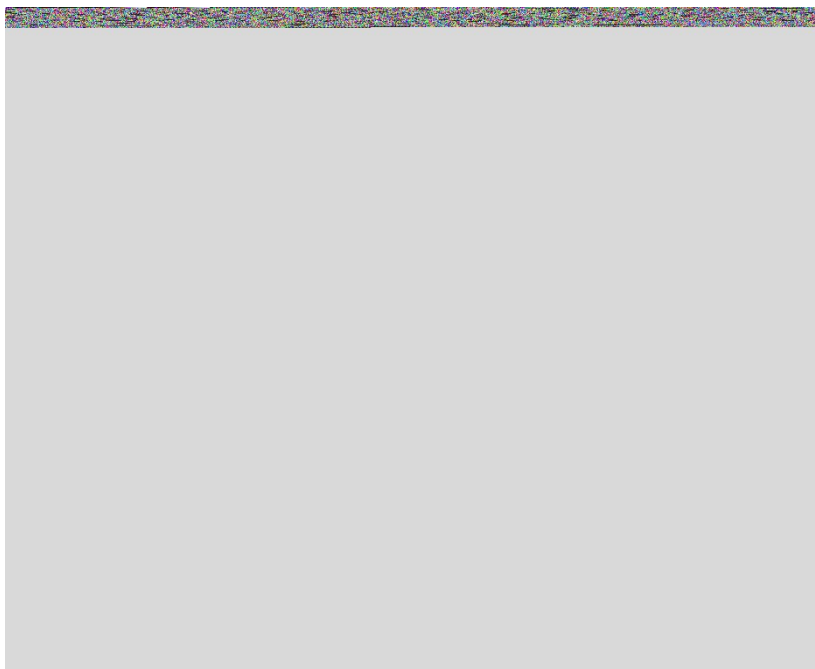

**Fig. S10.** The influence of Br<sup>-</sup> resource on haloperoxidase mimic activity.

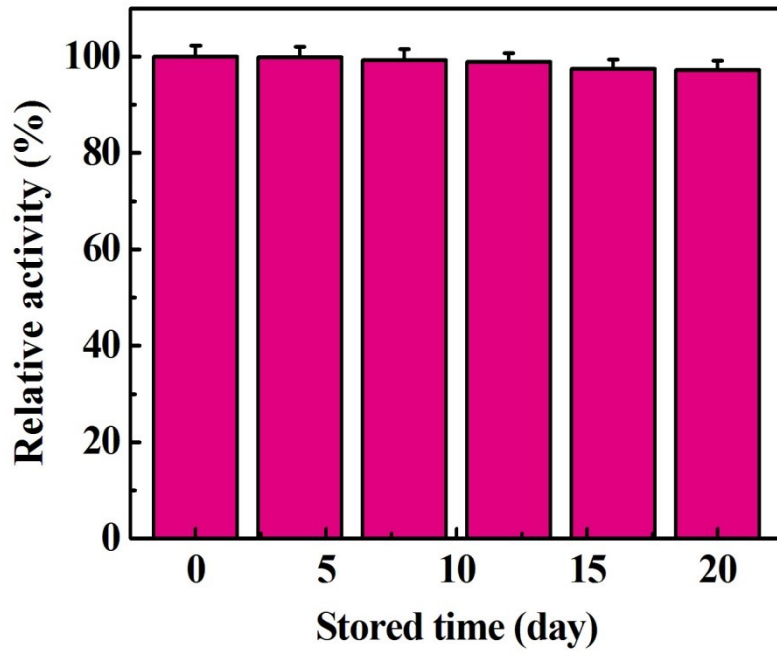

**Fig. S11.** The influence of stored time on haloperoxidase mimic activity.

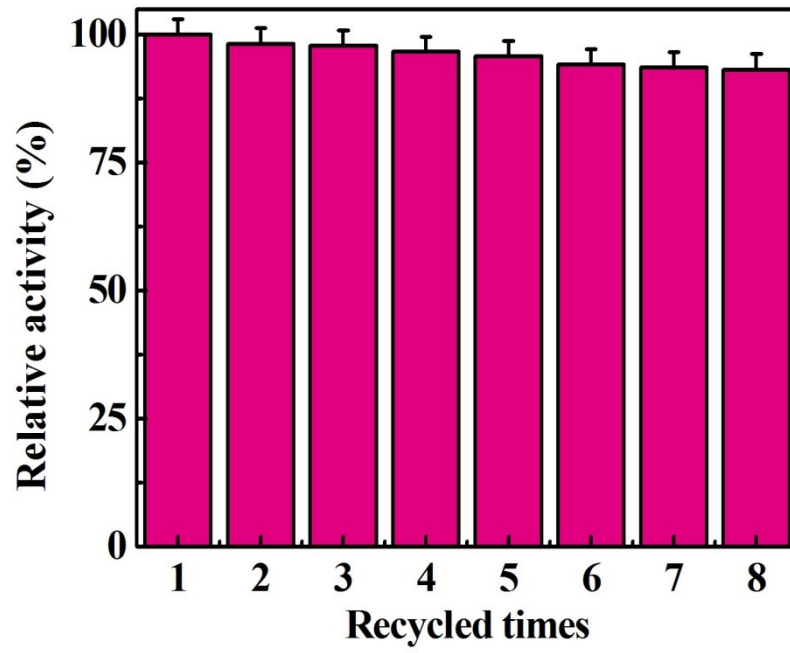

**Fig. S12.** The influence of recycled times on haloperoxidase mimic activity.

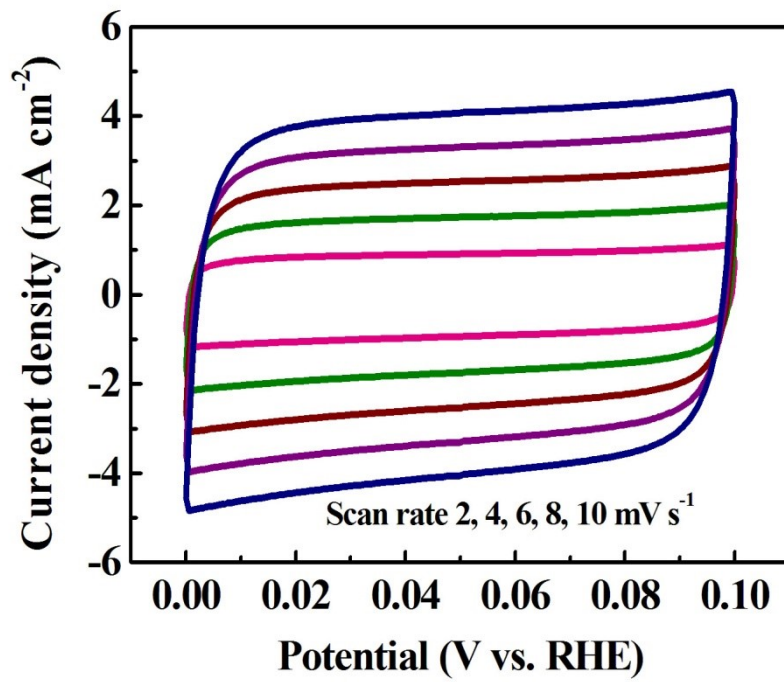

**Fig. S13.** The CV curves of  $\text{Ni}_{16}\text{Mo}_{16}\text{P}_{24}$  at different scanning rates.



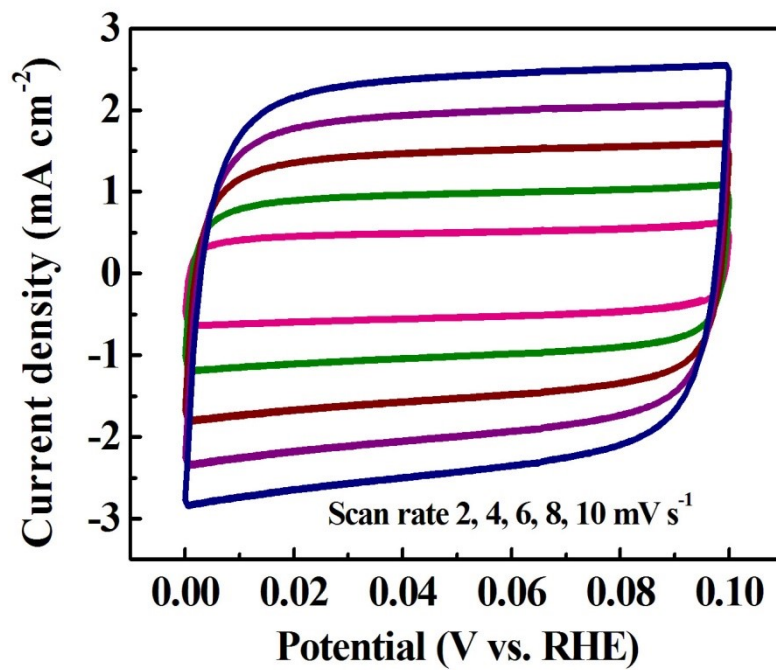

**Fig. S14.** The CV curves of  $\text{Co}_{16}\text{Mo}_{16}\text{P}_{24}$  at different scanning rates.
